# Supplementary material for: Synthesis and Study of New Quinolineaminoethanols as Anti-Bacterial Drugs
Source: MDPI journal article supplement (doi:10.3390/ph12020091), 2019-06-18

## Supplementary Materials

# Synthesis and Study of New Quinolineaminoethanols as Anti-Bacterial Drugs

**Pierre Laumailé<sup>1</sup>, Alexandra Dassonville-Klimpt<sup>1,\*</sup>, François Peltier<sup>1,2</sup>, Catherine Mullié<sup>1</sup>, Claire Andréjak<sup>1,3</sup>, Sophie Da-Nascimento<sup>1</sup>, Sandrine Castelain<sup>1,2</sup>, Pascal Sonnet<sup>1,\*</sup>**

<sup>1</sup> AGIR, EA 4294, UFR of Pharmacy, Jules Verne University of Picardie, 80037, Amiens, France

<sup>2</sup> Department of Bacteriology, Amiens University Hospital, Amiens, France.

<sup>3</sup> Respiratory and Intensive Care Unit, University Hospital Amiens, Amiens, 80054, France.

\* Correspondence: alexandra.dassonville@u-picardie.fr and pascal.sonnet@u-picardie.fr

NMR spectra of compounds **4a-4v**

Figure S1:  $^1\text{H}$  NMR of compound **4a** (400 MHz, Chloroform-*d*)

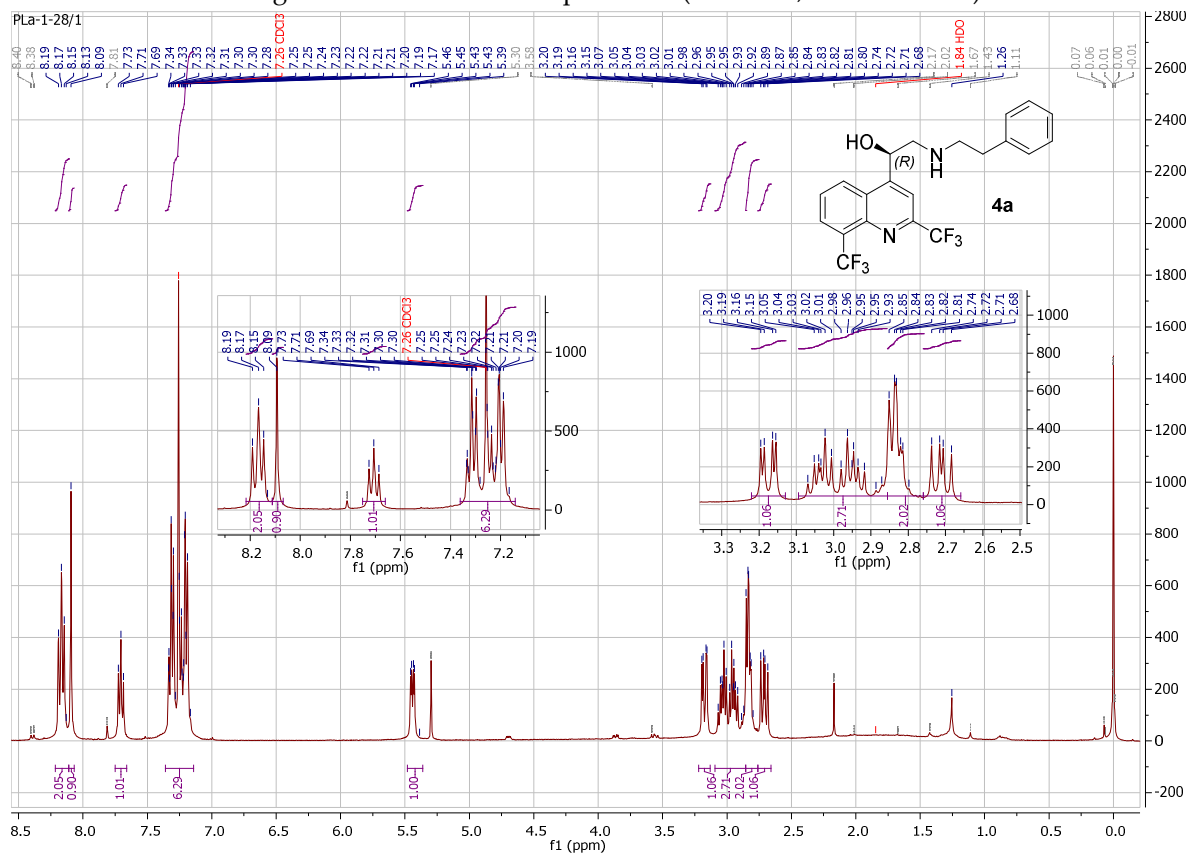

Figure S2:  $^{13}\text{C}$  NMR of compound **4a** (101 MHz, Chloroform-*d*)

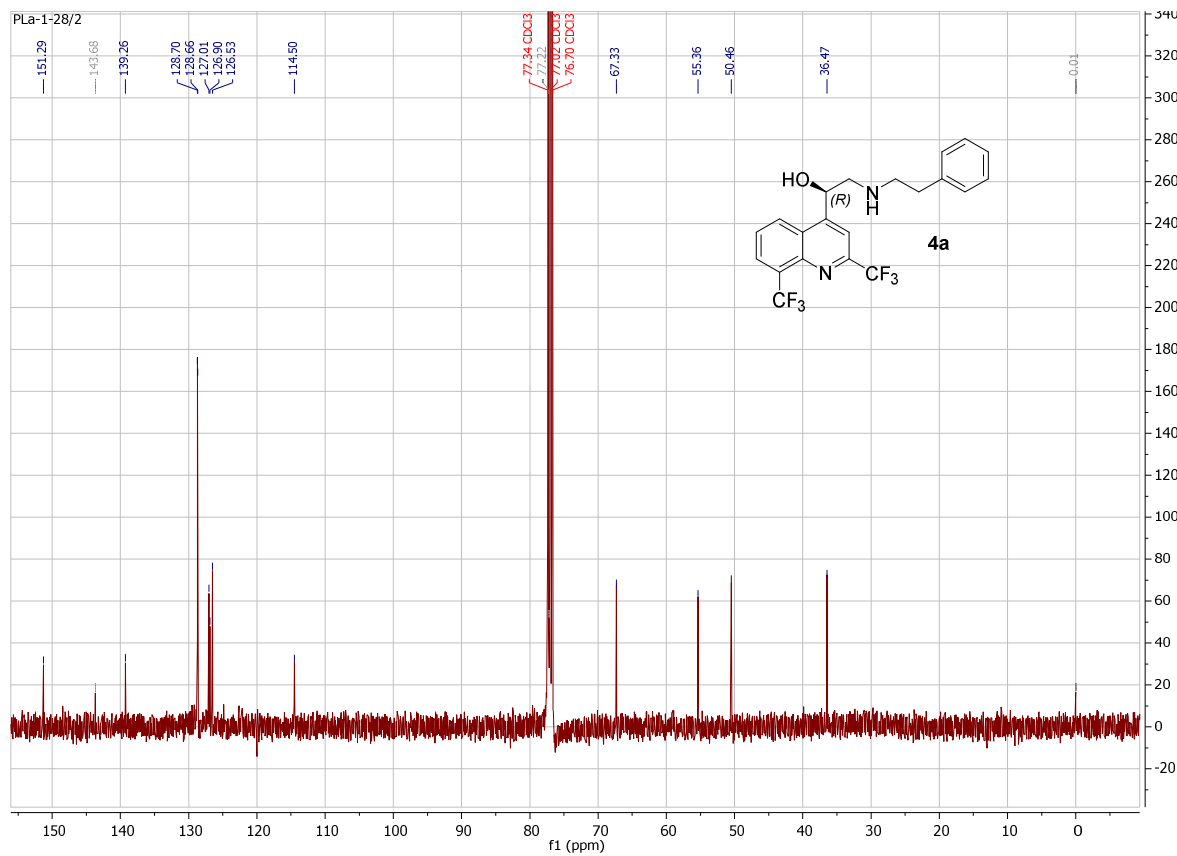

Figure S3:  $^1\text{H}$  NMR of compound **4c** (400 MHz, Chloroform- $d$ )

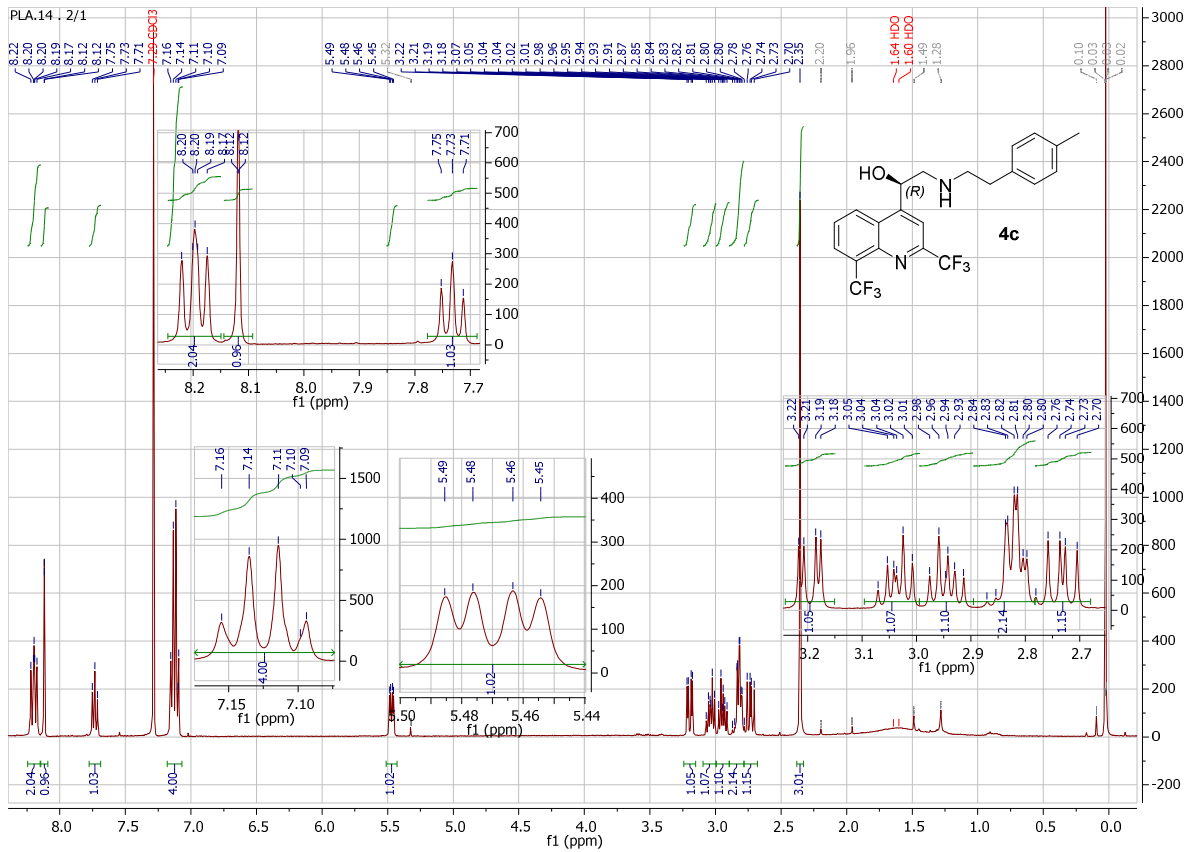

Figure S4:  $^{13}\text{C}$  NMR of compound **4c** (101 MHz, Chloroform- $d$ )

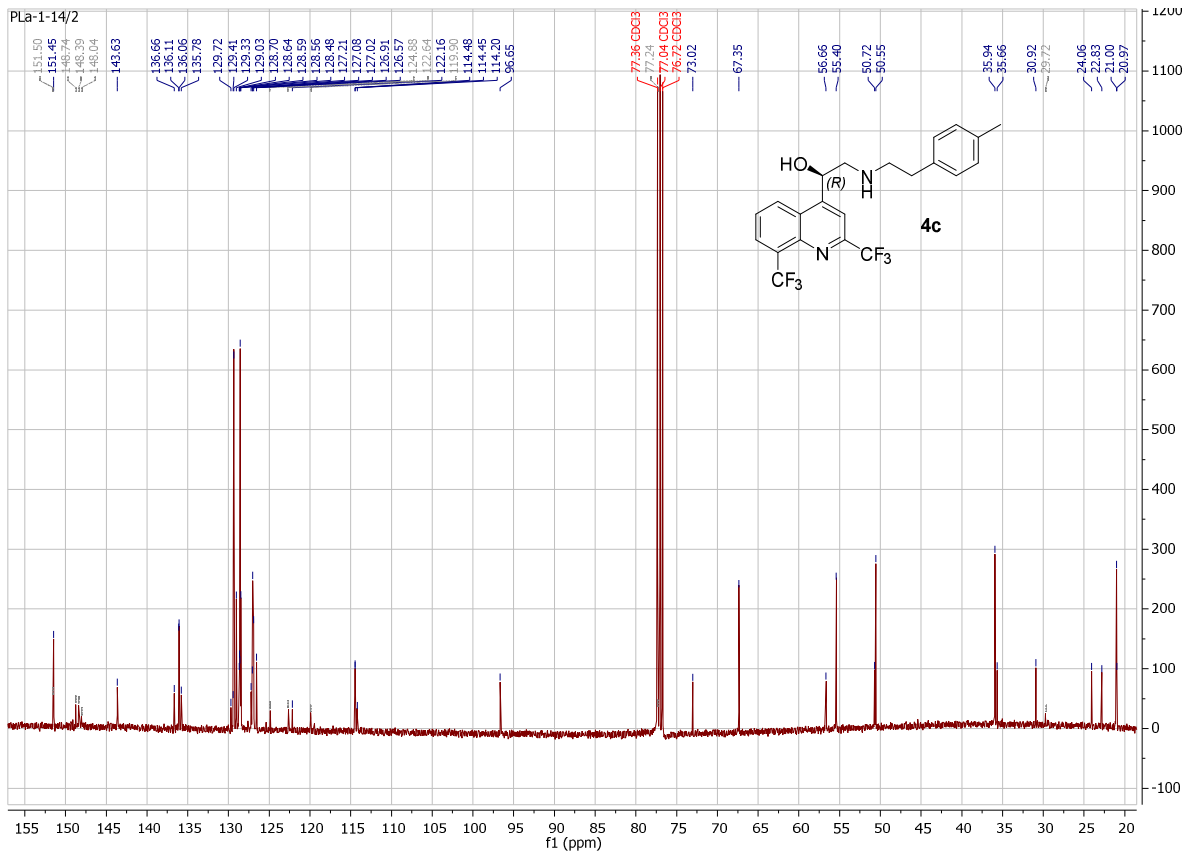

Figure S5: <sup>1</sup>H NMR of compound 4e (400 MHz, Chloroform-d)

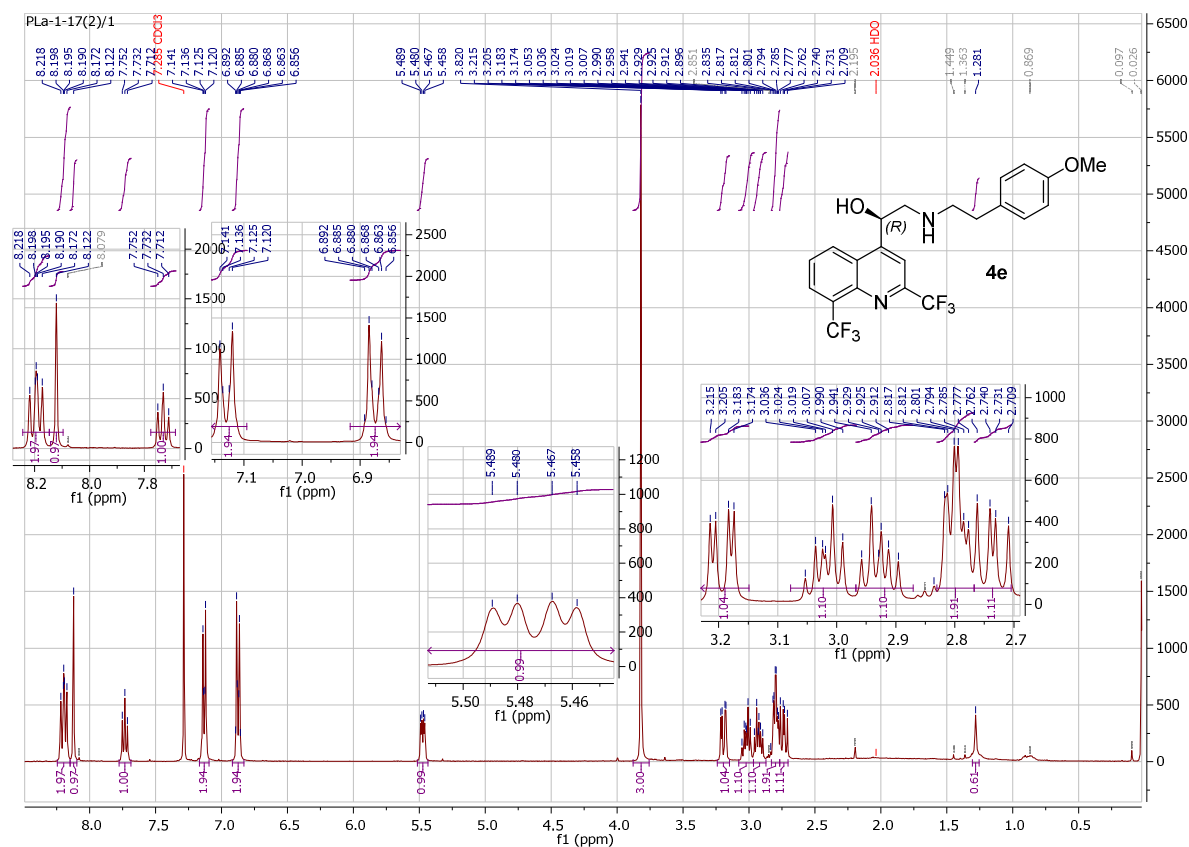

Figure S6: <sup>13</sup>C NMR of compound 4e (101 MHz, Chloroform-d)

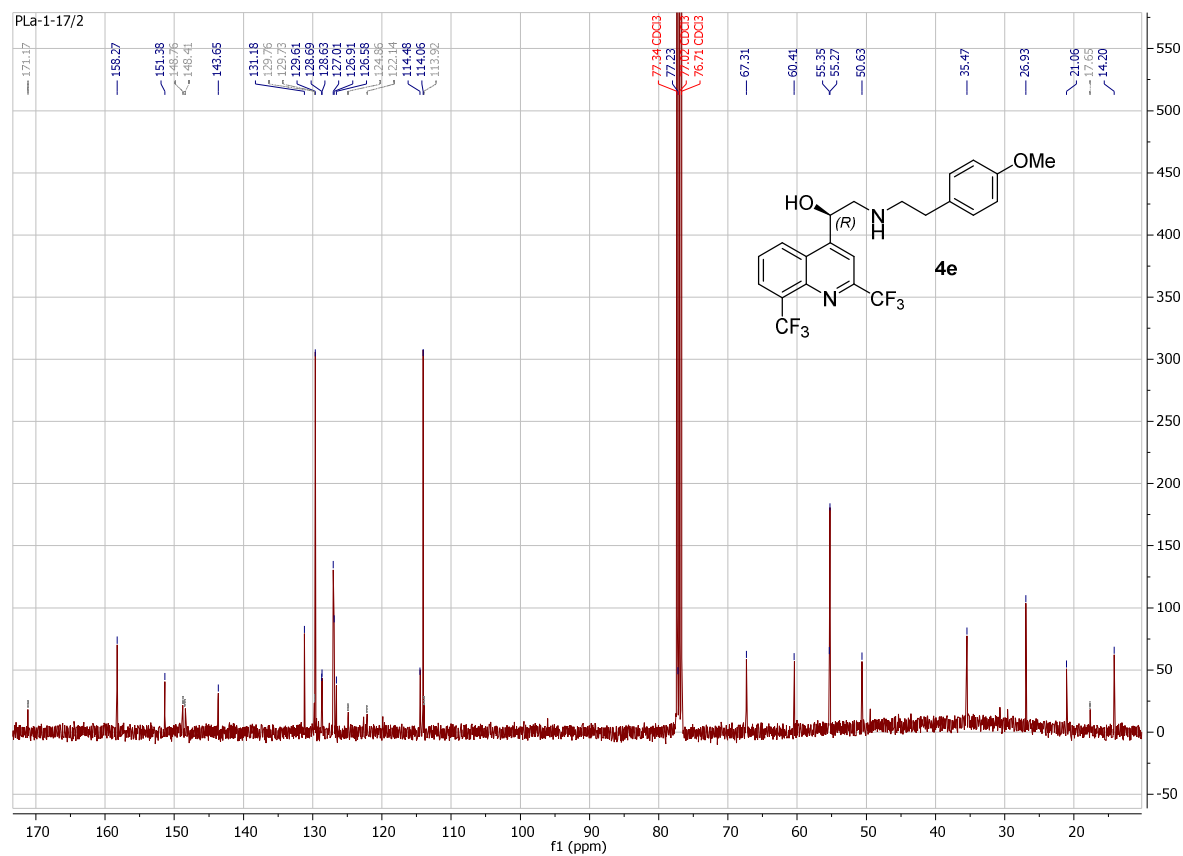

Figure S7:  $^1\text{H}$  NMR of compound **4g** (400 MHz, Chloroform- $d$ )

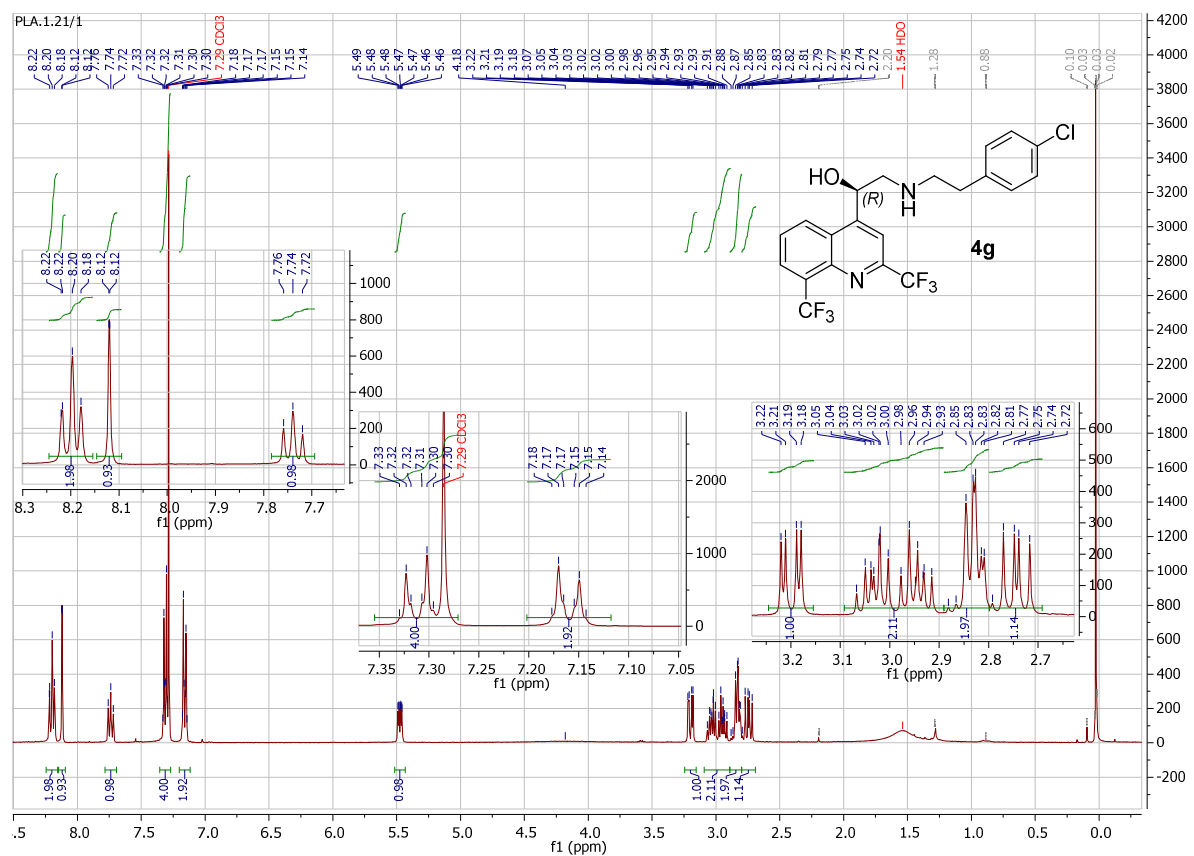

Figure S8:  $^{13}\text{C}$  NMR of compound **4g** (101 MHz, Chloroform- $d$ )

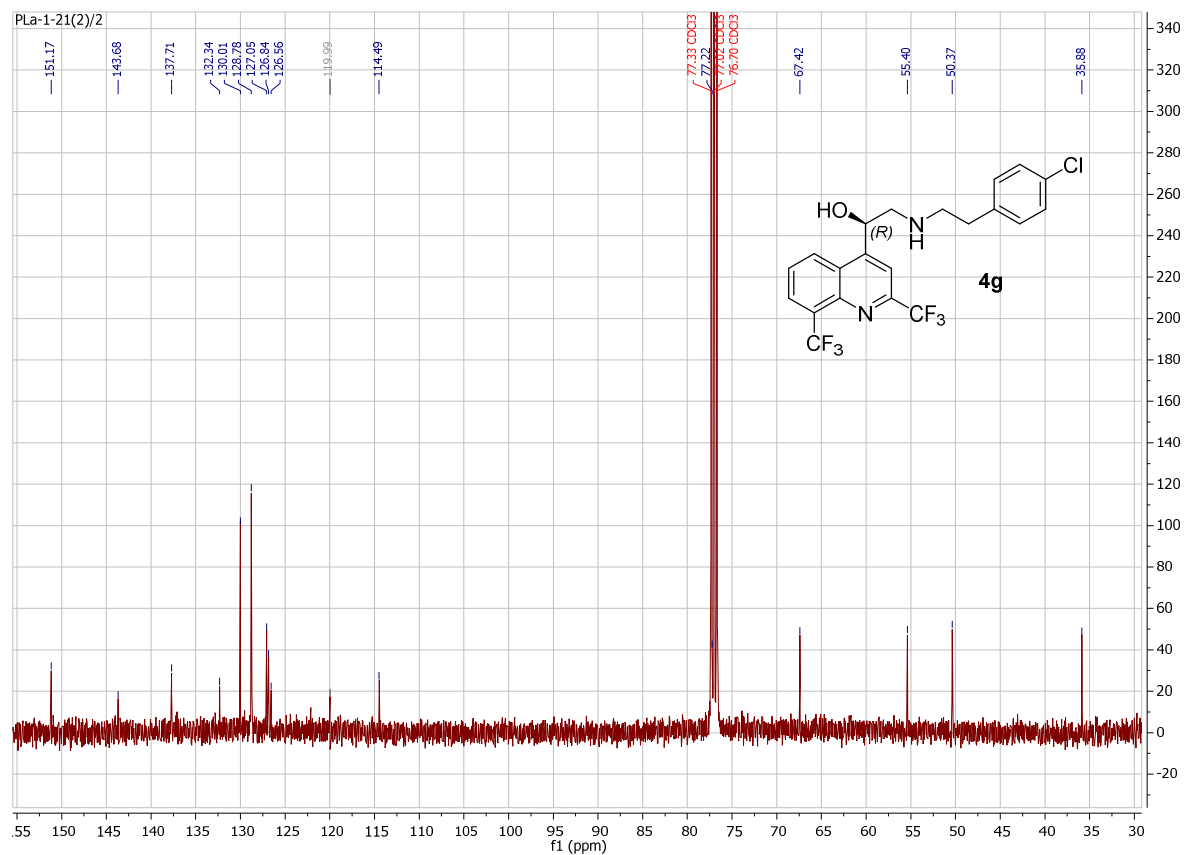

Figure S9:  $^1\text{H}$  NMR of compound **4i** (400 MHz,  $\text{DMSO-}d_6$ )

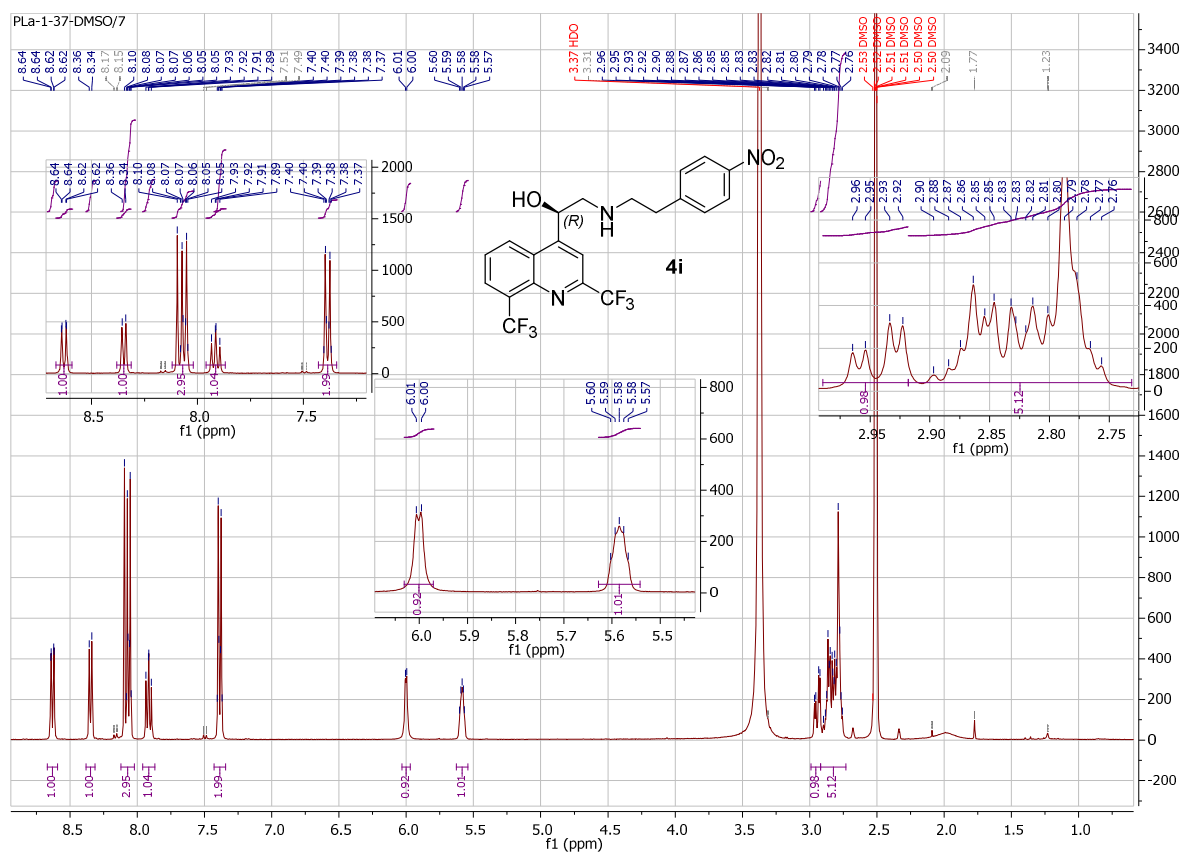

Figure S10:  $^{13}\text{C}$  NMR of compound **4i** (101 MHz,  $\text{DMSO-}d_6$ )

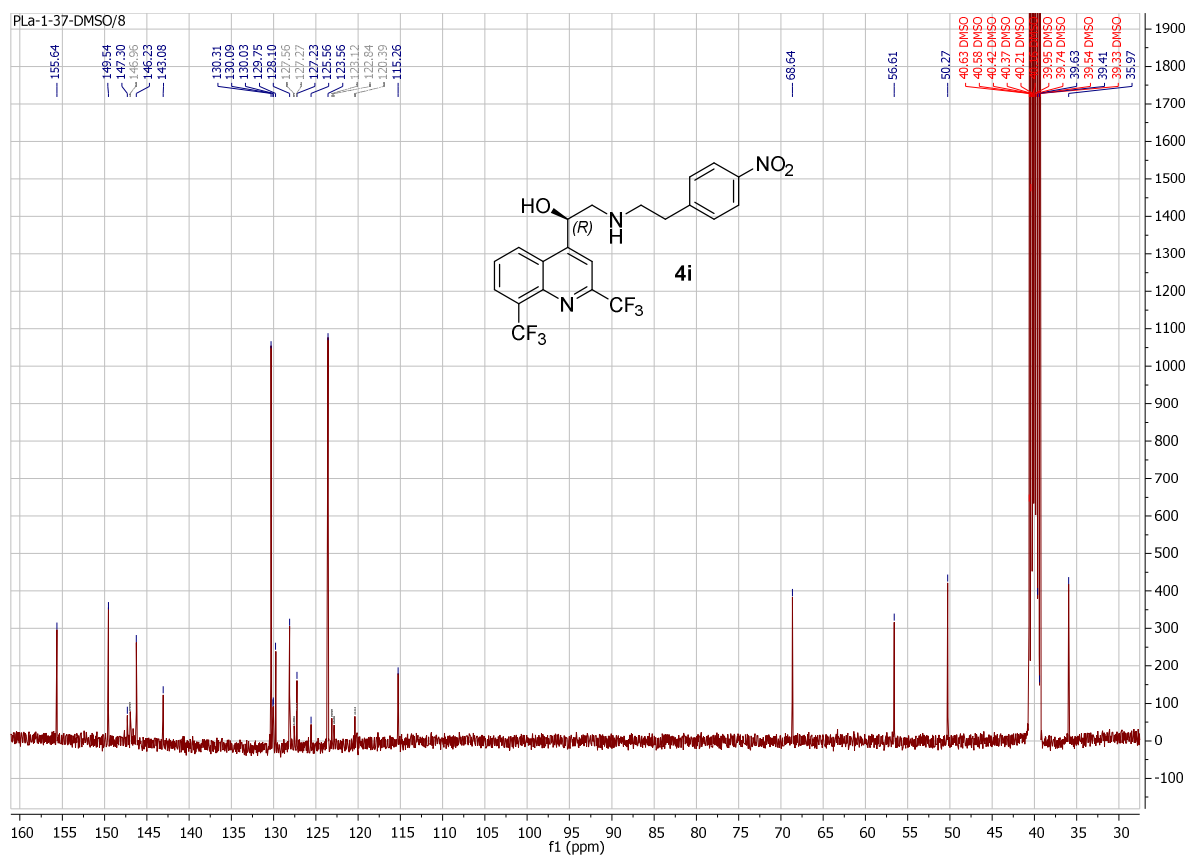

Figure S11: <sup>1</sup>H NMR of compound 4k (400 MHz, Chloroform-d)

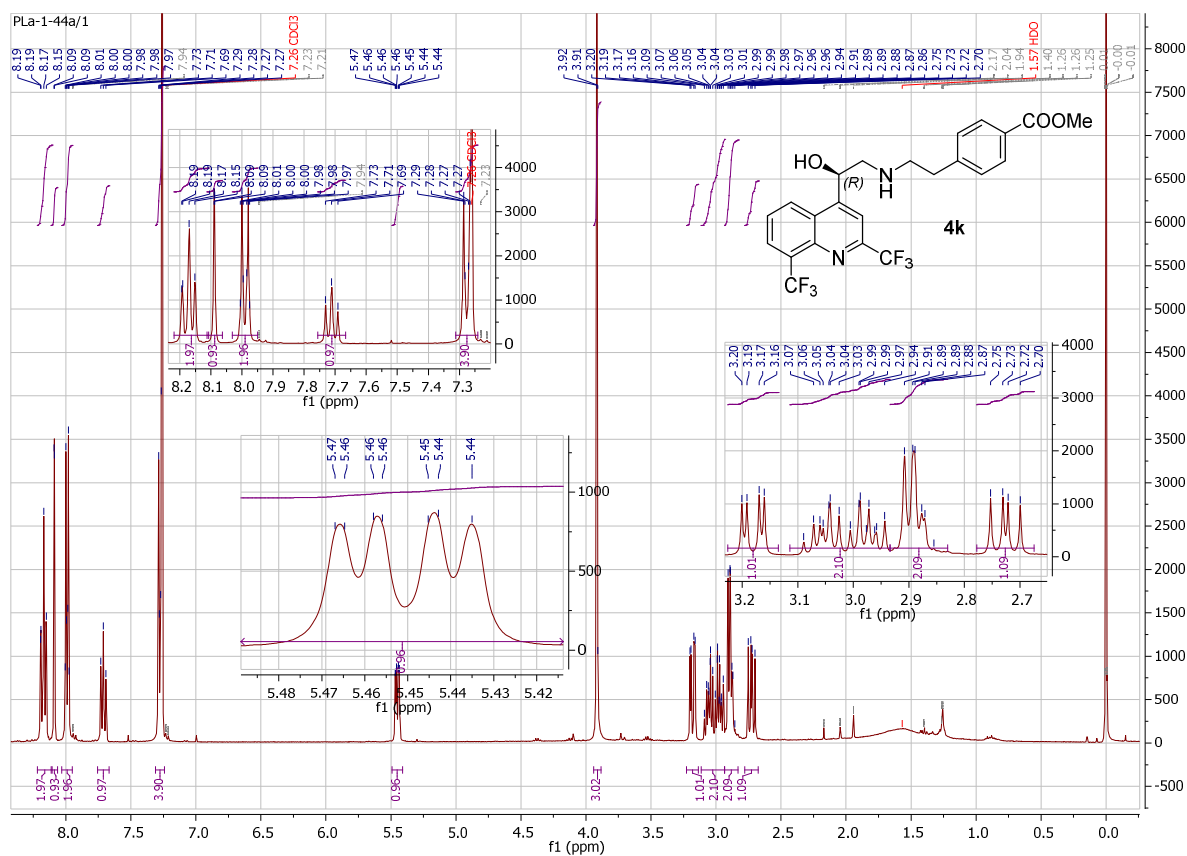

Figure S12: <sup>13</sup>C NMR of compound 4k (101 MHz, Chloroform-d)

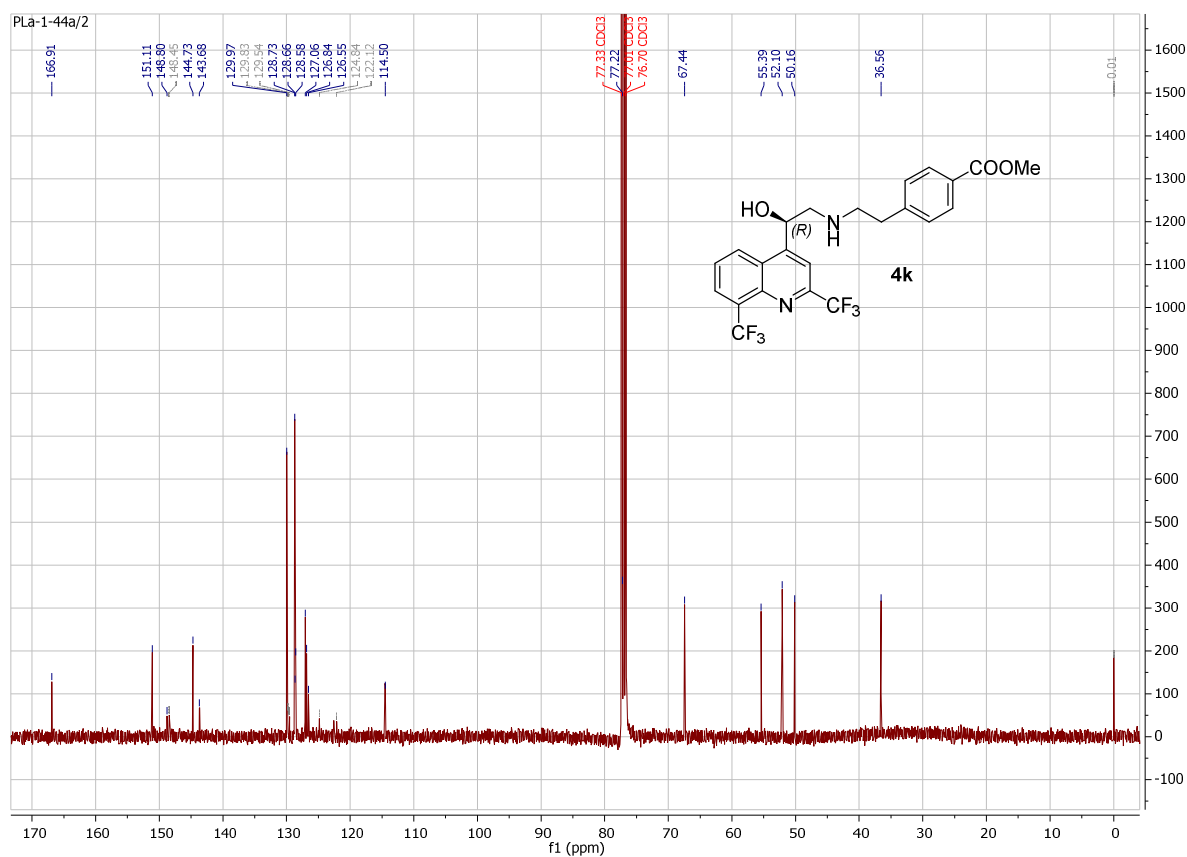

Figure S13: <sup>1</sup>H NMR of compound **4m** (400 MHz, Chloroform-*d*)

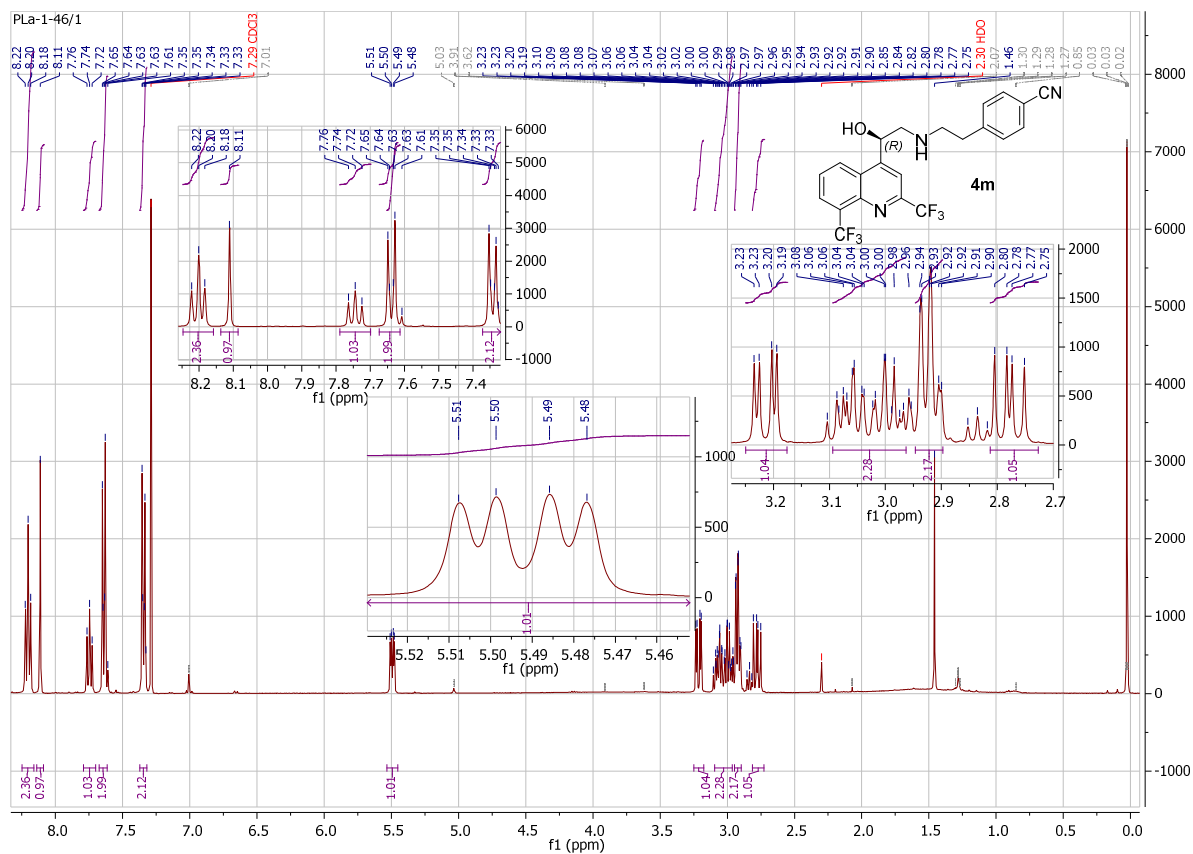

Figure S14: <sup>13</sup>C NMR of compound **4m** (101 MHz, Chloroform-*d*)

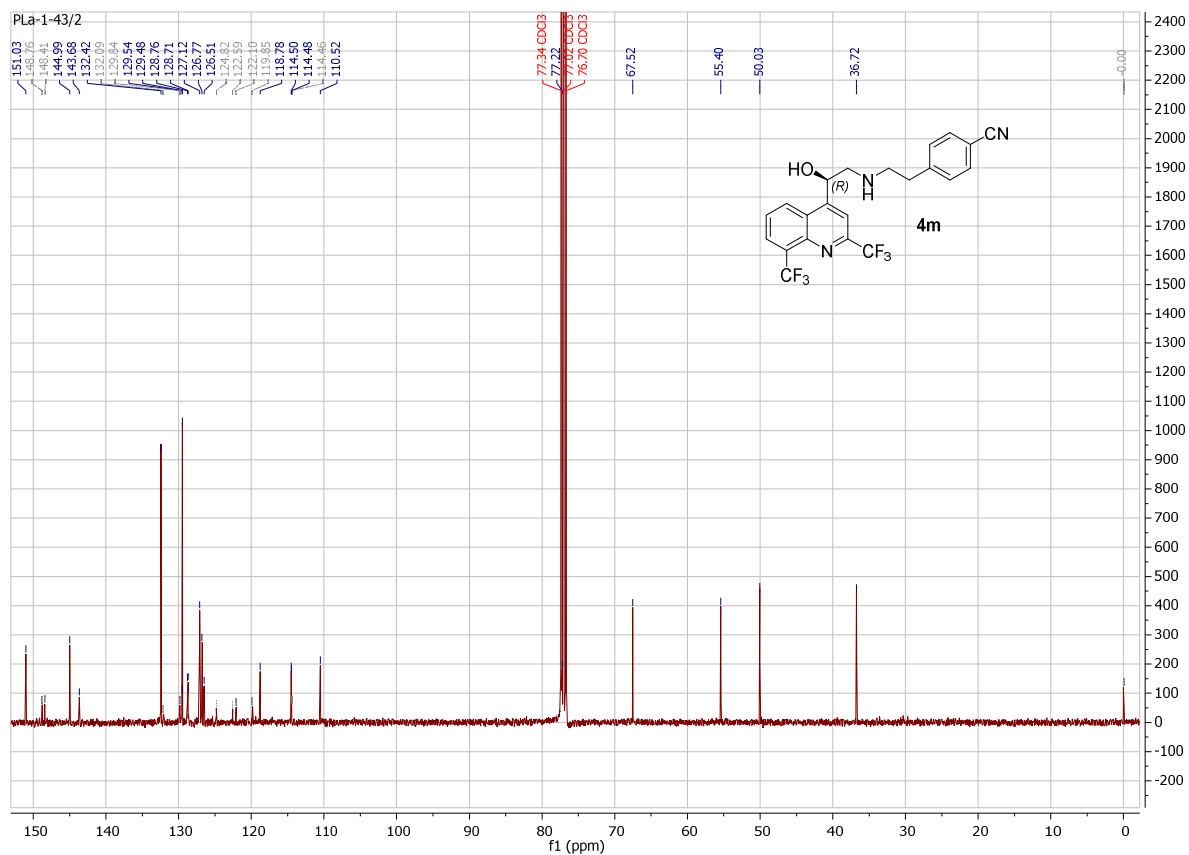



Figure S15:  $^1\text{H}$  NMR of compound **4o** (400 MHz, Methanol- $d_4$ )

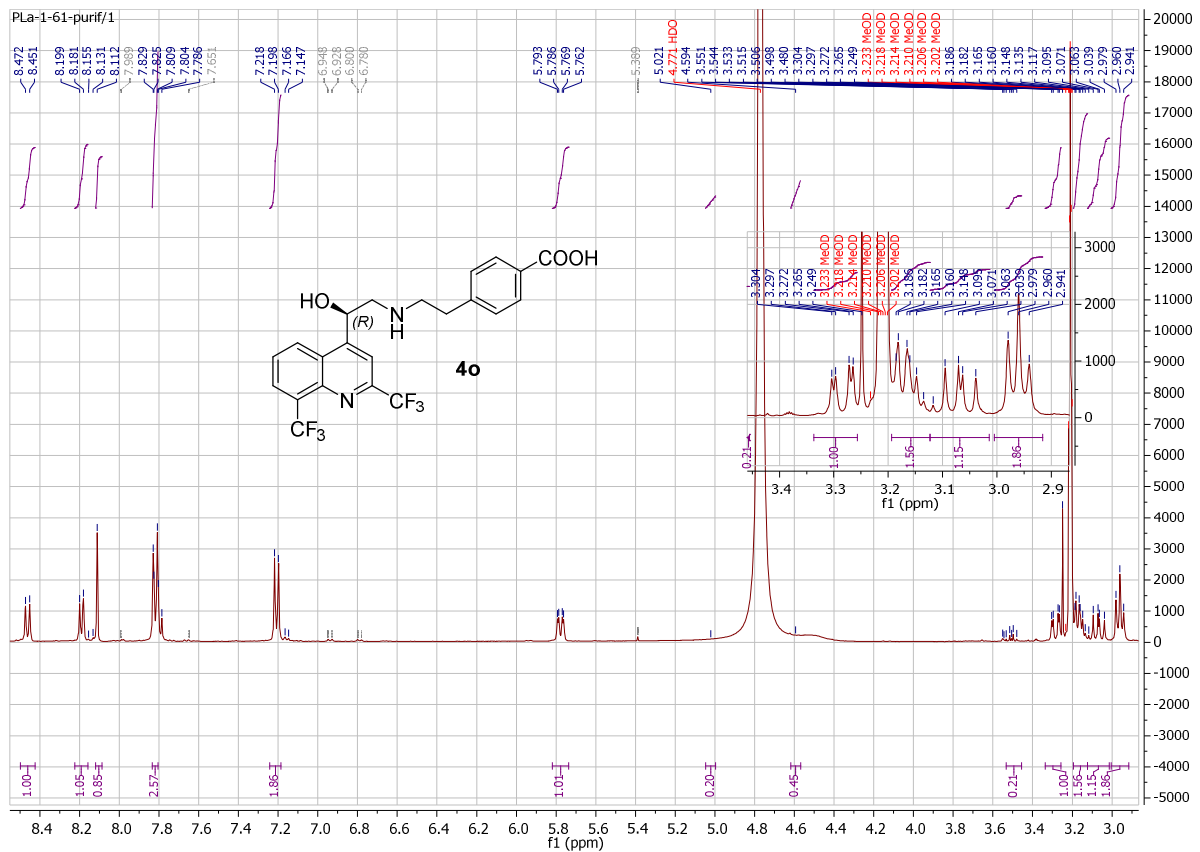

Figure S16:  $^{13}\text{C}$  NMR of compound **4o** (101 MHz, Methanol- $d_4$ )

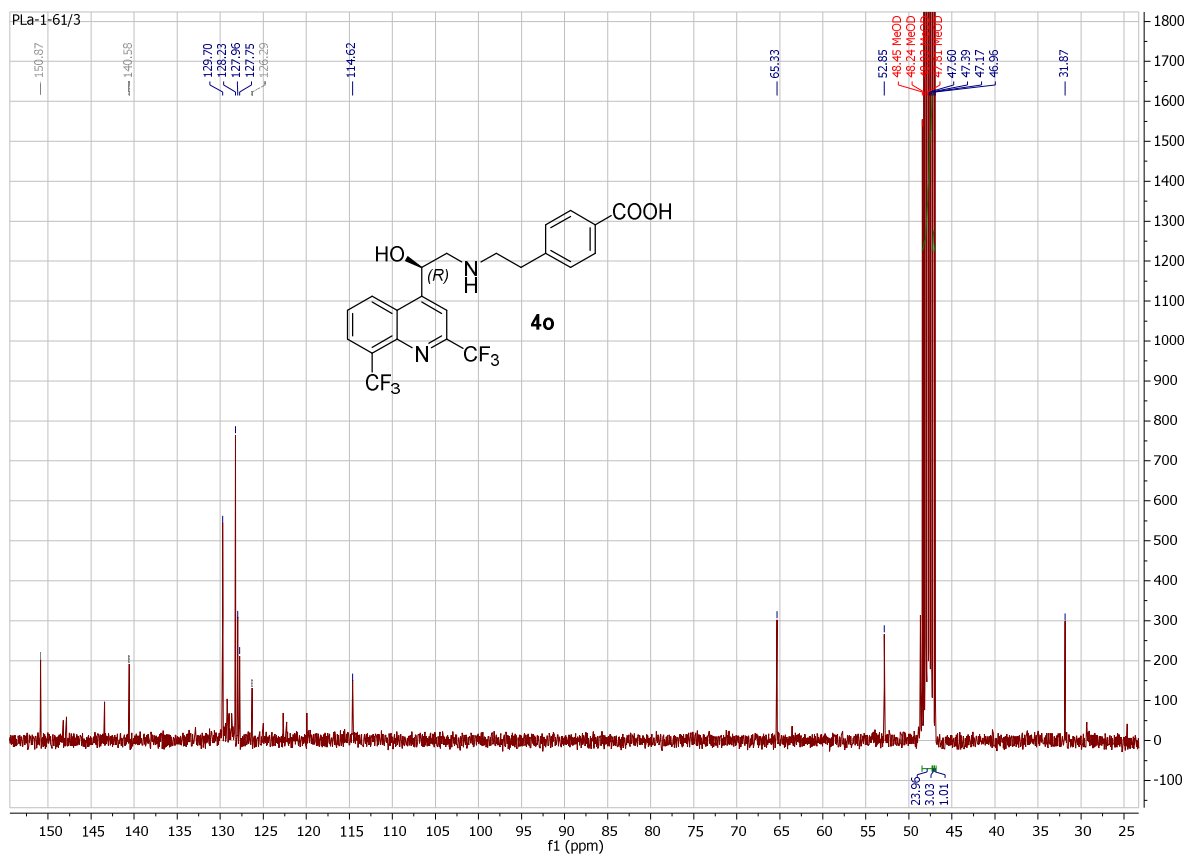

Figure S17:  $^1\text{H}$  NMR of compound **4q** (400 MHz, Methanol- $d_4$ )

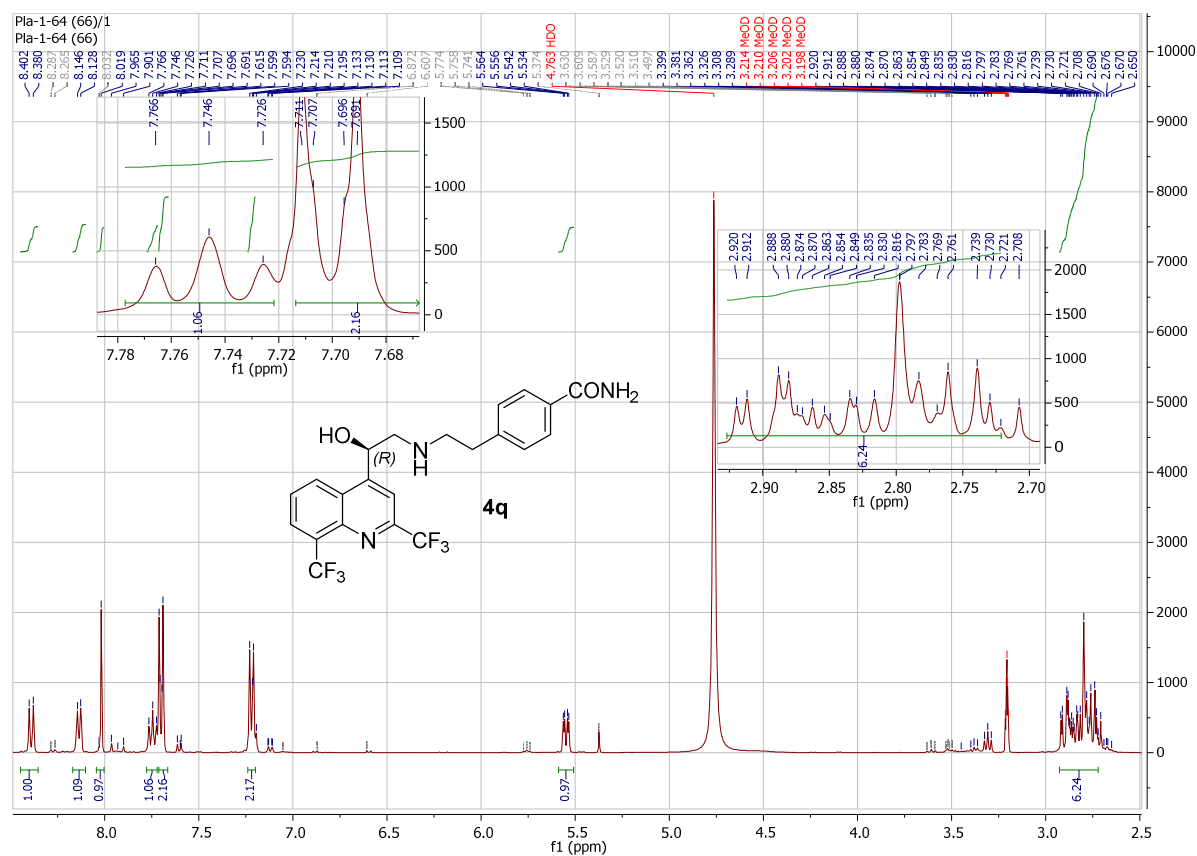

Figure S18:  $^{13}\text{C}$  NMR of compound **4q** (101 MHz, Methanol- $d_4$ )

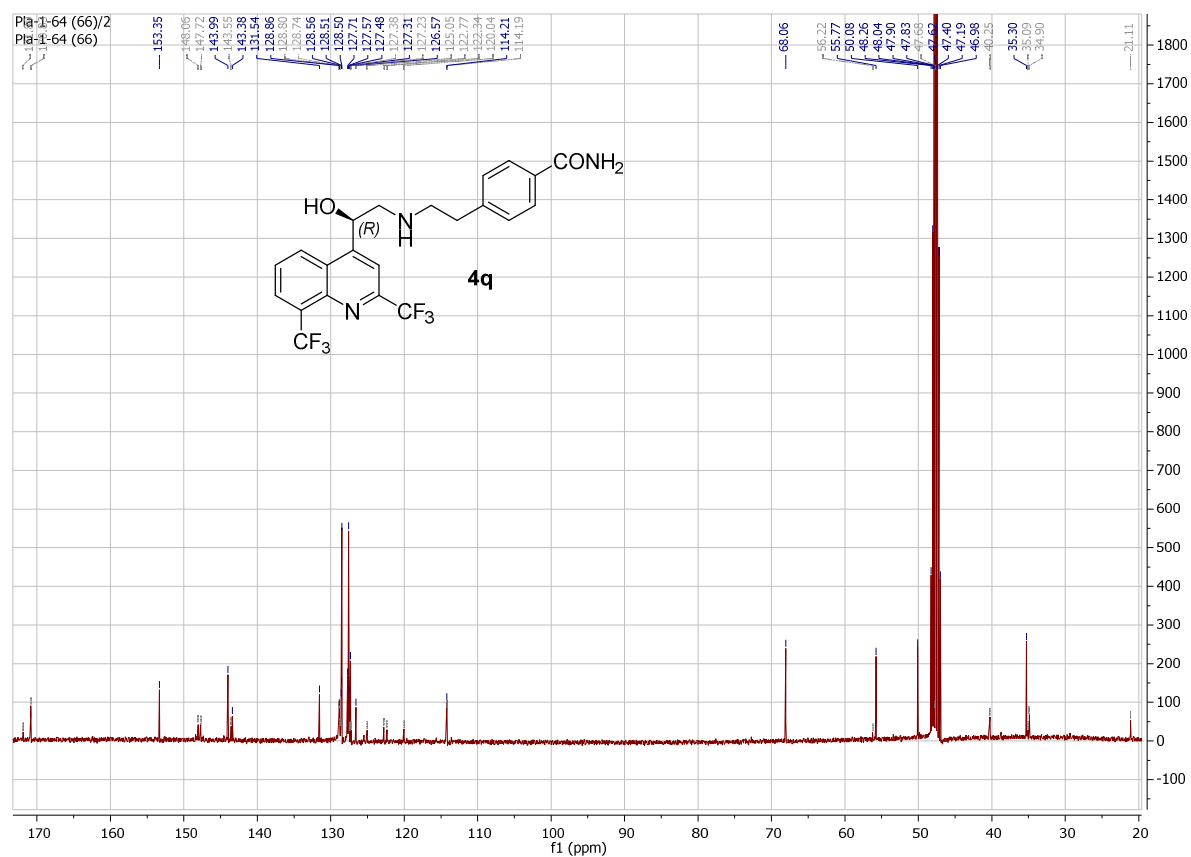

Figure S19: <sup>1</sup>H NMR of compound **4s** (400 MHz, Methanol-*d*<sub>4</sub>)

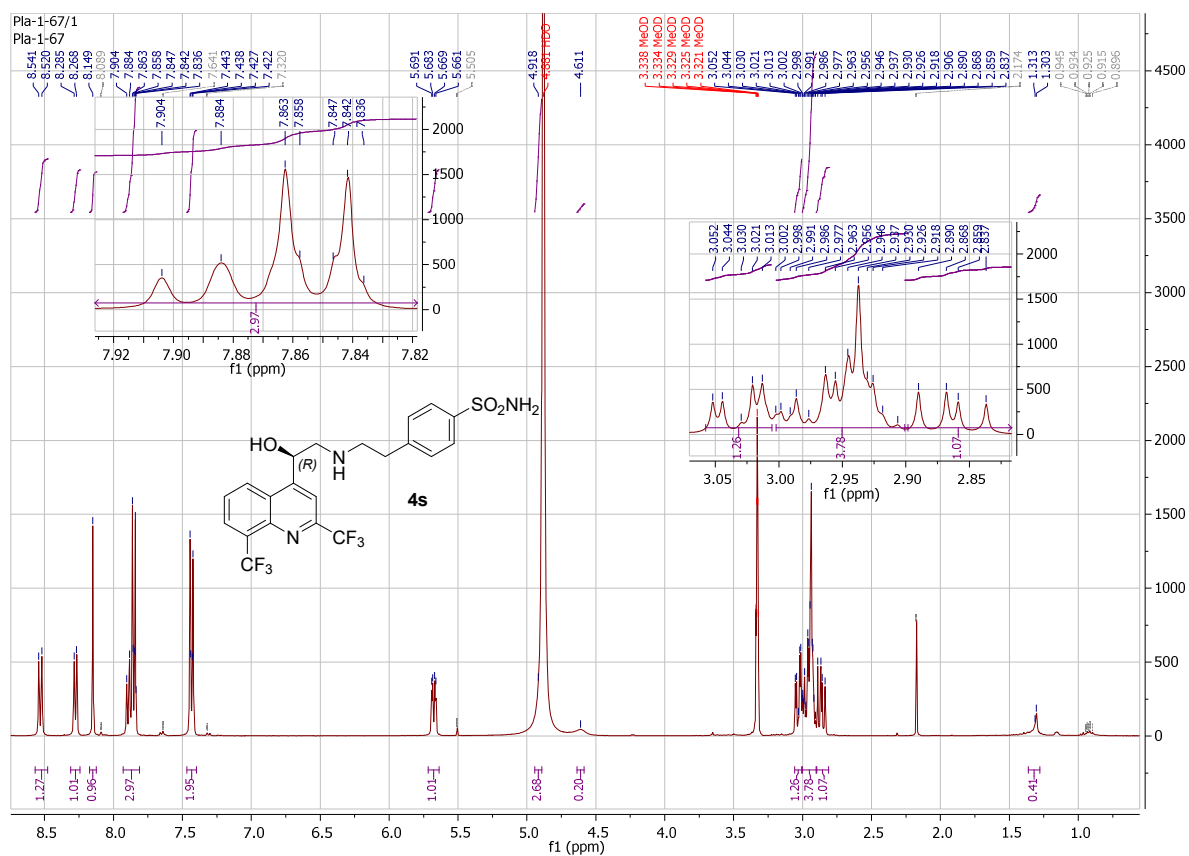

Figure S20: <sup>13</sup>C NMR of compound **4s** (101 MHz, Methanol-*d*<sub>4</sub>)

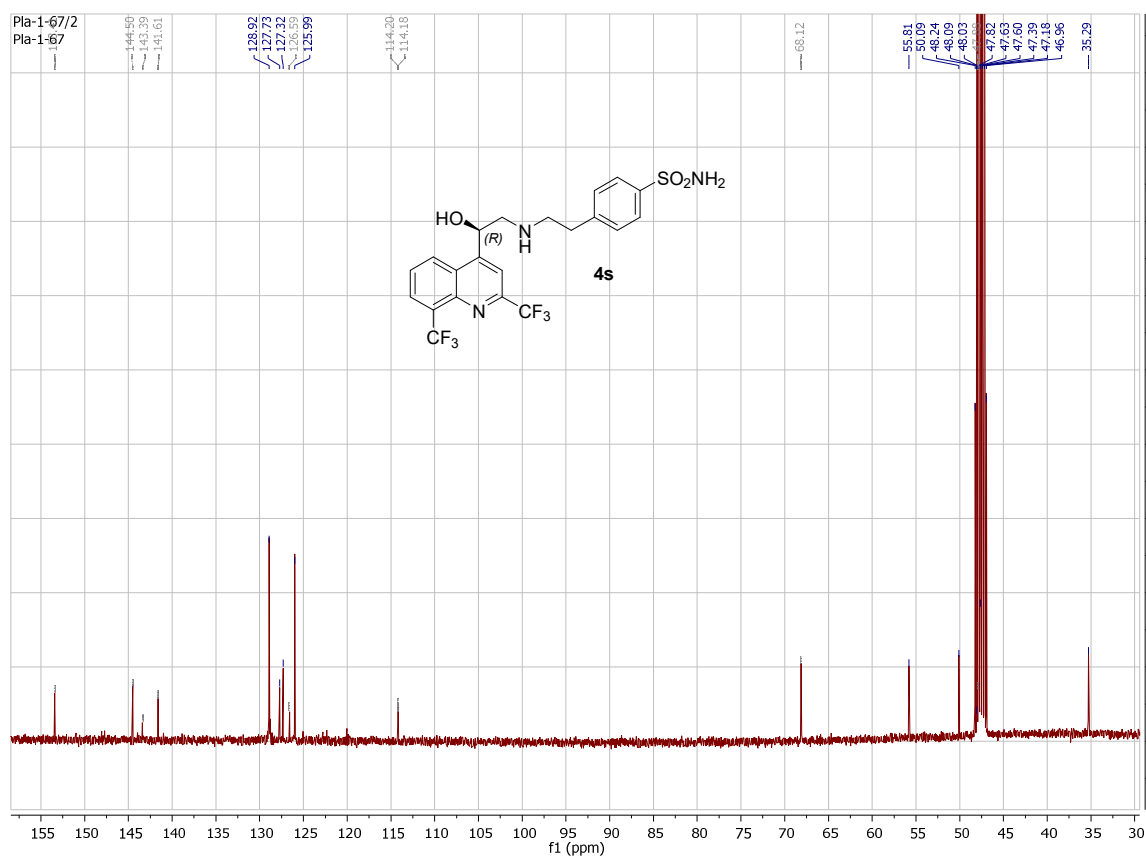

Figure S21:  $^1\text{H}$  NMR of compound **4u** (400 MHz, Chloroform- $d$ )

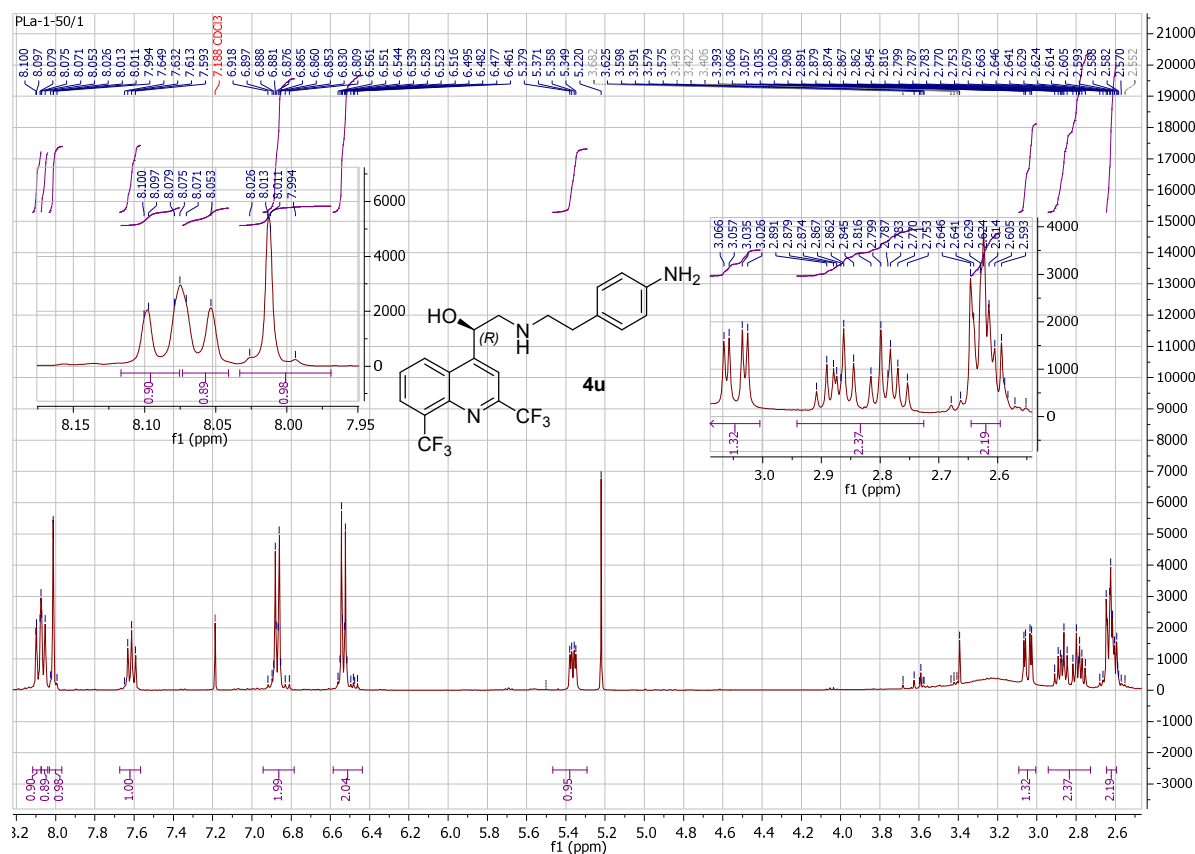

Figure S22:  $^{13}\text{C}$  NMR of compound **4u** (101 MHz, Chloroform- $d$ )

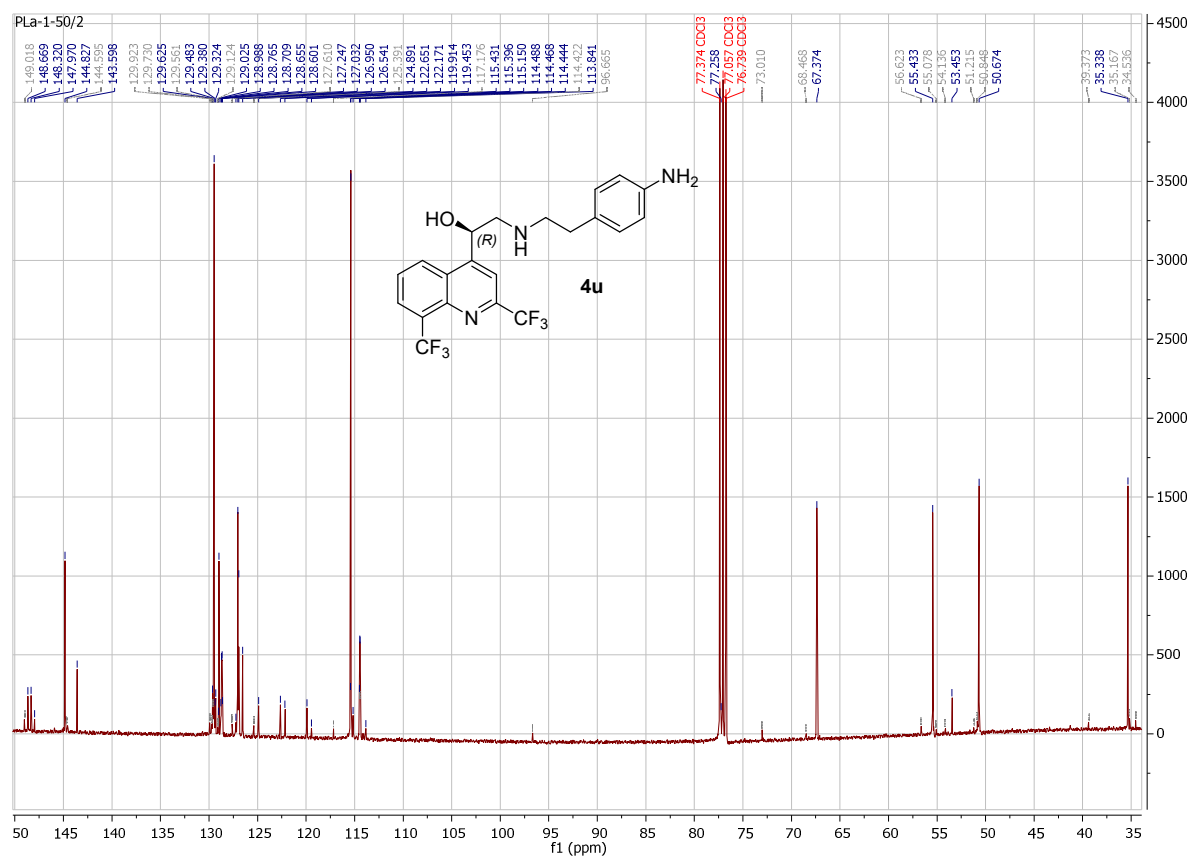

Supplement: s1 [file s1]
